# Supplementary material
Source: PubMed Central journal article supplement (PMC3753939)
Supplement: AEM.00964-13_zam999104639so1.pdf [file AEM.00964-13_zam999104639so1.pdf]

**Supplementary Table 1** Final fermentation characteristics (g.l<sup>-1</sup>) of the five EUROSCARF deletion strains selected for further analysis.

|                    | <i>Residual sugars</i> |                 |                 |                |                       |                      |
|--------------------|------------------------|-----------------|-----------------|----------------|-----------------------|----------------------|
|                    | <i>Glucose</i>         | <i>Fructose</i> | <i>Glycerol</i> | <i>Ethanol</i> | <i>Glycerol Yield</i> | <i>Ethanol Yield</i> |
| <i>BY4742</i>      |                        |                 |                 |                |                       |                      |
| <i>(wild-type)</i> | 7.4 ±0.2               | 40 ±0.5         | 4.7 ±0.1        | 68 ±0.9        | 4.4 ±1.0              | 44.5 ±0.9            |
| <i>tps1 -Δ</i>     | 0 ±0.0                 | 10.6 ±10.6      | 8.8 ±1.0        | 80.2 ±2.8      | 7.6 ±1.8              | 42.2 ±1.1            |
| <i>tdh3 -Δ</i>     | 0 ±0.0                 | 0 ±0.0          | 6.2 ±0.1        | 86.5 ±0.9      | 4.4 ±1.0              | 43.2 ±0.8            |
| <i>zwf1 -Δ</i>     | 0 ±0.0                 | 13.5 ±1.5       | 5.7 ±0.2        | 87.9 ±1.0      | 3.9 ±0.2              | 47.1 ±.8             |
| <i>aco1 -Δ</i>     | 4.9 ±0.9               | 27.5 ±2.7       | 6.3 ±0.2        | 79.4 ±3.0      | 4.6 ±0.2              | 47.6 ±0.9            |
| <i>aco2 -Δ</i>     | 0 ±0.0                 | 17.9 ±2.9       | 6.1 ±0.2        | 91.2 ±3.1      | 2.7 ±0.2              | 50 ±1.2              |

Data was generated at 200g.l<sup>-1</sup> sugar in a synthetic grape must. Values are the average of three repeats ± standard deviation.

**Supplementary Table 2** Concentrations of key metabolites for all transformed strains and their controls throughout fermentation.

| GLUCOSE     | 0     | 5           | 11         | 18          |
|-------------|-------|-------------|------------|-------------|
| Control     | 101.2 | 13.1 ± 1.74 | 0          | 0           |
| DUT-TPS     | 101.2 | 21.3 ± 2.0  | 2.3 ± 0.4  | 0           |
| GIP-TPS     | 101.2 | 25 ± 4.8    | 2.3 ± 1.1  | 0           |
| DUT control | 101.2 | 22 ± 2.6    | 3.4 ± 0.7  | 0           |
| GIP control | 101.2 | 19.4 ± 0.15 | 1.6 ± 0.6  | 0           |
| FRUCTOSE    |       |             |            |             |
| Control     | 99.8  | 35.8 ± 5.7  | 7.1 ± 3.6  | 4 ± 0.4     |
| DUT-TPS     | 99.8  | 42.1 ± 6.3  | 15.1 ± 4.2 | 5.1 ± 1.1   |
| GIP-TPS     | 99.8  | 39.3 ± 4.1  | 13 ± 2.8   | 4 ± 0.5     |
| DUT control | 99.8  | 39.1 ± 6    | 10.4 ± 3.6 | 3.8 ± 0.3   |
| GIP control | 99.8  | 33.5 ± 3.9  | 11.9 ± 2.6 | 3.8 ± 0.8   |
| ETHANOL     |       |             |            |             |
| Control     | 0     | 78.2 ± 1.9  | 99 ± 2.6   | 103.8 ± 2.7 |
| DUT-TPS     | 0     | 60.4 ± 4.2  | 84.5 ± 1   | 89.7 ± 1.7  |
| GIP-TPS     | 0     | 72.5 ± 3.5  | 89.7 ± 0.8 | 90.4 ± 0.4  |
| DUT control | 0     | 74.8 ± 3.5  | 94.1 ± 1.8 | 101.9 ± 2.9 |
| GIP control | 0     | 74.6 ± 0.4  | 94.5 ± 0.9 | 99.1 ± 1.4  |
| GLYCEROL    |       |             |            |             |
| Control     | 0     | 4.8 ± 0.4   | 5.4 ± 0.5  | 5.6 ± 0.3   |
| DUT-TPS     | 0     | 6.6 ± 0.4   | 7 ± 0.5    | 6.3 ± 0.15  |
| GIP-TPS     | 0     | 5.3 ± 0.3   | 6.7 ± 0.6  | 6.6 ± 0.35  |
| DUT control | 0     | 5.2 ± 0.1   | 6.5 ± 0.2  | 6.1 ± 0.4   |
| GIP control | 0     | 5.4 ± 0.2   | 5.9 ± 0.1  | 6.3 ± 0.2   |

Values are the average of three biological repeats ± standard deviation.

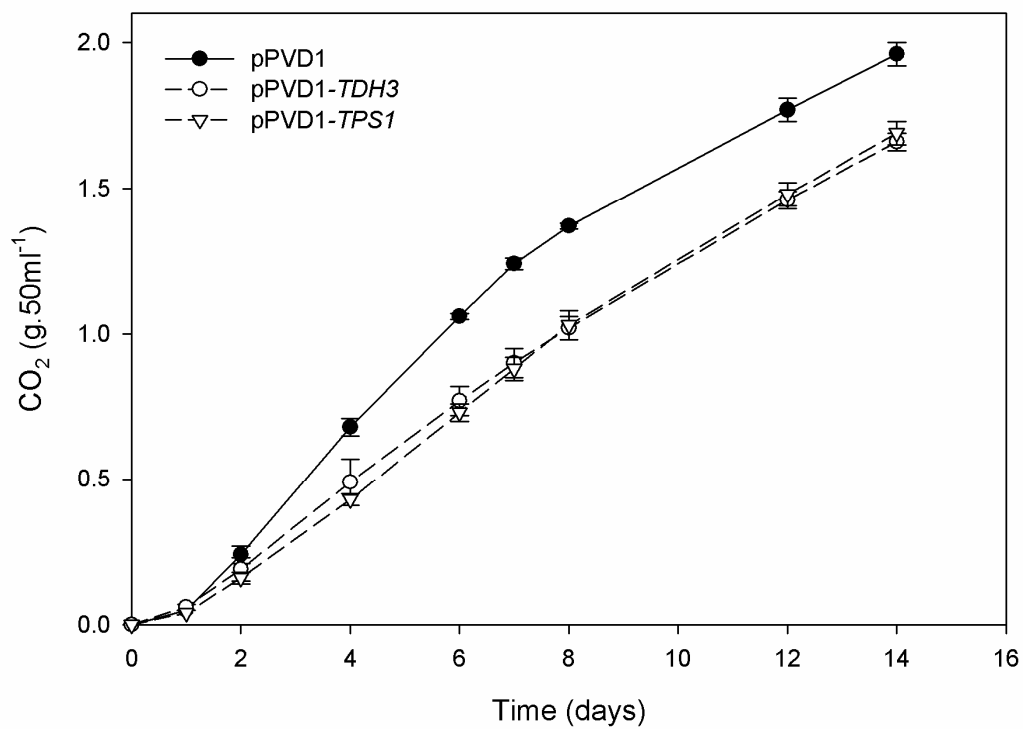

**Supplementary Fig 1.** CO<sub>2</sub> generation (g.50ml<sup>-1</sup>) for strains over-expressing *TDH3* and *TPS1* from the pPVD1 construct (PGK1 promoter, 2μ) in the BY4742 genetic background. Fermentations were started at 100g.l<sup>-1</sup> sugar in a synthetic grape must.
